# Supplementary material
Source: PubMed Central journal article supplement (PMC2493063)
Supplement: NIHMS705-supplement-1.pdf [file NIHMS705-supplement-1.pdf]

**Supplementary Table 1.** Gene-gene interaction analysis for the *CYP27B1* –1260 polymorphism.

|                                       | Affected Offspring <sup>a</sup> | Cases <sup>a</sup> |
|---------------------------------------|---------------------------------|--------------------|
| <i>INS</i> (rs689; –23 <i>Hph</i> I)  | 0.37 (1,753)                    | 0.50 (4,203)       |
| <i>CTLA4</i> (rs3087243; CT60)        | 0.0045 (2,167)                  | 0.18 (4,163)       |
| <i>PTPN22</i> (rs2476601; Arg620Trp)  | 0.37 (2,071)                    | 0.39 (4,188)       |
| <i>HLA-DRB1</i> <sup>b</sup>          | 0.037 (2,101)                   | 0.033(1,897)       |
| <i>VDR</i> (rs2544043)                | 0.82 (1,683)                    | 0.55 (1,543)       |
| <i>VDR</i> (rs12721366)               | 0.20 (791)                      | 0.72 (1,555)       |
| <i>VDR</i> (rs4303288)                | 0.18 (1,976)                    | 0.12 (1,524)       |
| <i>VDR</i> (rs10735810; <i>Fok</i> I) | 0.78 (2,069)                    | NT                 |
| <i>VDR</i> (rs7975232; <i>Apa</i> I)  | 0.64 (2,285)                    | NT                 |
| <i>VDR</i> (rs1544410; <i>Bsm</i> I)  | 0.93 (2,010)                    | NT                 |
| <i>VDR</i> (rs731236; <i>Taq</i> I)   | 0.86 (1,755)                    | NT                 |
| Age at diagnosis                      | 0.25 (2,460)                    | 0.88 (5,683)       |
| Sex                                   | 0.28 (2,515)                    | 0.45 (5,695)       |

a - data are *P*-values obtained using a regression model as a score test for association (*n* individuals) as described previously (15);

b - we used the following genotype coding for the *HLA-DRB1* gene: DR3/DR3, DR3/DR4, DR4/DR4, DR3/non-DR4, DR4/non-DR3 and non-DR3/non-DR4;

NT – not tested.
