# Supplementary material
Source: PubMed Central journal article supplement (PMC2493063)
Supplement: NIHMS705-supplement-2.pdf [file NIHMS705-supplement-2.pdf]

**Supplementary Table 2.** Association of allele C of the *CYP27B1* –1260 polymorphism with type 1 diabetes stratified by the *HLA-DRB1* genotypes.

| <i>HLA-DRB1</i> |       |      |             |                 |       |          |      |             |                 |
|-----------------|-------|------|-------------|-----------------|-------|----------|------|-------------|-----------------|
| genotype        | Trios | RR   | (95% CI)    | <i>P</i> -value | Cases | Controls | OR   | (95% CI)    | <i>P</i> -value |
| DR3/3           | 193   | 1.28 | (0.91-1.81) | 0.161           | 183   | 23       | 0.61 | (0.28-1.34) | 0.22            |
| DR3/4           | 871   | 1.19 | (1.02-1.39) | 0.0283          | 691   | 67       | 0.74 | (0.48-1.13) | 0.17            |
| DR3/X           | 276   | 0.94 | (0.73-1.21) | 0.655           | 46    | 309      | 0.99 | (0.75-1.31) | 0.94            |
| DR4/4           | 198   | 1.01 | (0.72-1.41) | 0.932           | 88    | 68       | 1.35 | (0.86-2.12) | 0.20            |
| DR4/X           | 428   | 1.08 | (0.88-1.32) | 0.445           | 503   | 443      | 1.08 | (0.87-1.34) | 0.51            |
| DRX/X           | 104   | 0.89 | (0.55-1.44) | 0.622           | 86    | 715      | 0.9  | (0.63-1.27) | 0.54            |

X – non-DR3 and non-DR4 *HLA-DRB1* allele; RR – relative risk; OR – odds ratio; 95%

CI – 95% confidence interval
