# Supplementary material
Source: PubMed Central journal article supplement (PMC2493063)
Supplement: NIHMS705-supplement-3.pdf [file NIHMS705-supplement-3.pdf]

**Supplementary note.**

TaqMan assays.

*CYP27B1* -1260 assay:

forward primer, GGGAGTAAGGAGCAGAGAGGTAAA;

reverse primer, AACAGAGAGAGGGCCTGTCT;

FAM-labeled probe, TGTGGGAGATTCTTTTA;

VIC-labeled probe, CTGTGGGAGATTATTTTA.

*CYP27B1* +2838 assay:

forward primer, GGTTTGGAAAGTTGGAAACAATGAGA;

reverse primer, GGACAGTCTAGGTTGCAAAGCA;

FAM-labeled probe, AATGGAGACAACAAGAT;

VIC-labeled probe, AAAATGGAGACAGCAAGAT.

rs8176345 assay:

forward primer, CCTCACCGTGTCCACTCC;

reverse primer, GTTGCCTGCCCAGTCCAT;

FAM-labeled probe, AAATGTGACAGAGTTACTAT;

VIC-labeled probe, AAATGTGACAGAGTTGCTAT.

Details of the *CYP24A1* genotyping assays are available from the authors on request.
